# Supplementary material for: Highly specific detection of thrombin using an aptamer-based suspension array and the interaction analysis via microscale thermophoresis
Source: Royal Society of Chemistry journal article supplement (doi:10.1039/c5an00081e), 2015-01-01
Supplement: c5an00081e1.pdf [file c5an00081e1.pdf]

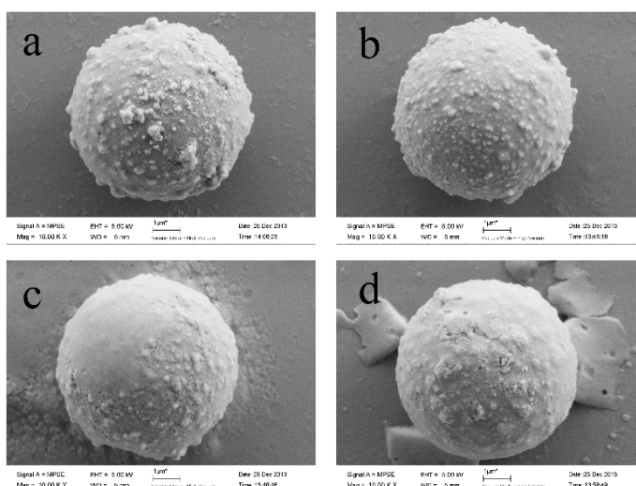

**Fig. S1.** Micrographs of the MBs in different reaction stages (SEM, 10,000 $\times$ ).

(a) The blank carboxyl-MB; (b) The MB coupled with TBA1;

(c) The MB-TBA1-thrombin-TBA2;

(d) The MB-TBA1-thrombin-TBA2-SA-PE .
